# Supplementary material for: Graphene-wrapped yolk–shell of silica-cobalt oxide as high-performing anode for lithium-ion batteries
Source: Royal Society of Chemistry journal article supplement (doi:10.1039/d4ra04236k), 2024-01-01
Supplement: d4ra04236k1.pdf [file d4ra04236k1.pdf]

## Supporting Information

### **Graphene-wrapped yolk-shell of silica-cobalt oxide as high-performing anode for lithium-ion batteries**

*Jingjing Ma,<sup>\*a,b</sup> Jiawei Yong,<sup>b</sup> Xiangnan Li,<sup>a</sup> Huishuang Zhang,<sup>a</sup> Yuanchao Li,<sup>b</sup>*

*Hongying Niu,<sup>b</sup> Shuting Yang,<sup>\*a</sup> Yu-Shi He<sup>c</sup> and Zi-Feng Ma<sup>c</sup>*

a. Postdoctoral Research Base, School of Chemistry and Chemical Engineering, Henan Normal University, Xinxiang, Henan 453007, PR China. E-mail: jingjingma\_xx@163.com; shutingyang@foxmail.com; Fax: +86-0373-3040148

b. Postdoctoral Station, School of Chemistry and Chemical Engineering, Henan Institute of Science and Technology, Xinxiang, Henan 453003, PR China

c. Shanghai Electrochemical Energy Devices Research Center, School of Chemistry and Chemical Engineering, Shanghai Jiao Tong University, Shanghai 200240, China

\* Corresponding author: jingjingma\_xx@163.com; shutingyang@foxmail.com

#### **EXPERIMENTAL SECTION**

Preparation of SiO<sub>2</sub>: SiO<sub>2</sub> was prepared via a Stöber sol-gel process. Aqueous ammonia (13 mL) and isopropanol (63.3 mL) were firstly added to 23.5 mL deionized water to form a uniform mixed suspension. Then added 5 mL of tetraethyl orthosilicate to the mixed suspension and stirred violently for 2 hours. After repeated centrifugation and sufficient drying, SiO<sub>2</sub> (300 nm) was finally obtained.

Preparation of GO: GO was synthesized by a modified Hummers' method. First, potassium peroxydisulfate (2.5 g), phosphoric anhydride (2.5 g) and flake graphite (5 g) were added to 50 mL of concentrated sulfuric acid (with a mass fraction of 98%) to form a mixed solution. Then the mixed solution was heated to 80 °C and stirred at a constant temperature for 6 h to complete the pre oxidation process. The pre-oxidized graphite was then washed and dried repeatedly. The pre-oxidized graphite solid and 15 g of potassium permanganate solid were successively added to 115 ml of concentrated sulfuric acid under ice water bath, fully stirred for 3.5 hours, then slowly added 400 ml of ultrapure water, stirred for 2 hours, and then added 20 ml of H<sub>2</sub>O<sub>2</sub> (with a mass fraction of 30%). After repeated centrifugation, washing and dialysis treatment, GO was finally obtained after drying.

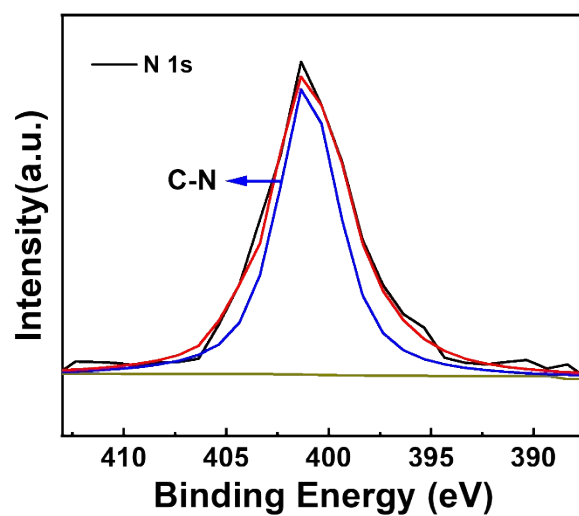

Fig. S1 N 1s XPS spectra.

Table S1 The ICP-OES results of SiO<sub>2</sub>@CoO/GS.

| Sample                   | Element | Weight (mg) | Volume (mL) | Dilution factor | Instrument reading (mg L <sup>-1</sup> ) | Concentration (wt.%) |
|--------------------------|---------|-------------|-------------|-----------------|------------------------------------------|----------------------|
| SiO <sub>2</sub> @CoO/GS | Si      | 1.4         | 50          | 1               | 3.91                                     | 28.0%                |
|                          | Co      |             |             |                 | 7.84                                     | 13.954%              |

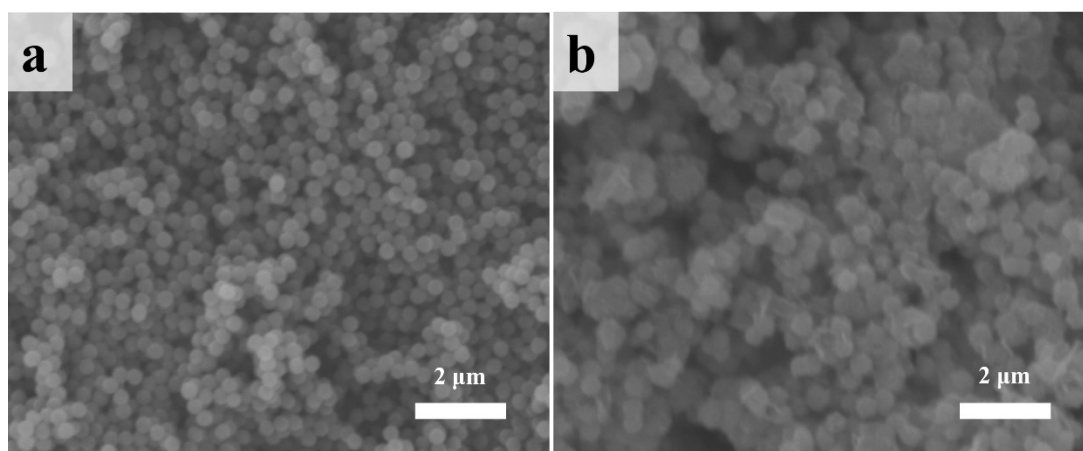

Fig. S2 SEM images of (a) SiO<sub>2</sub> and (b) SiO<sub>2</sub>@CoO.

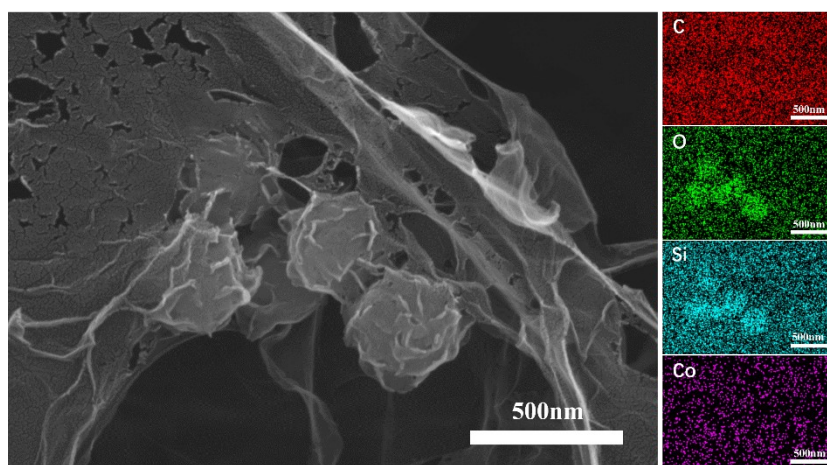

Fig. S3 EDS mapping images of SiO<sub>2</sub>@CoO/GS.

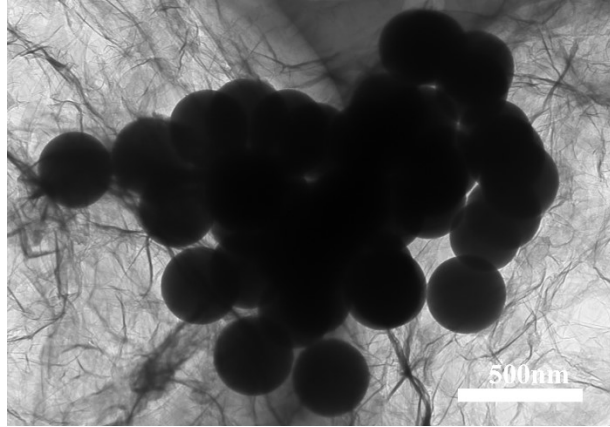

Fig. S4 TEM image of SiO<sub>2</sub>/GS.

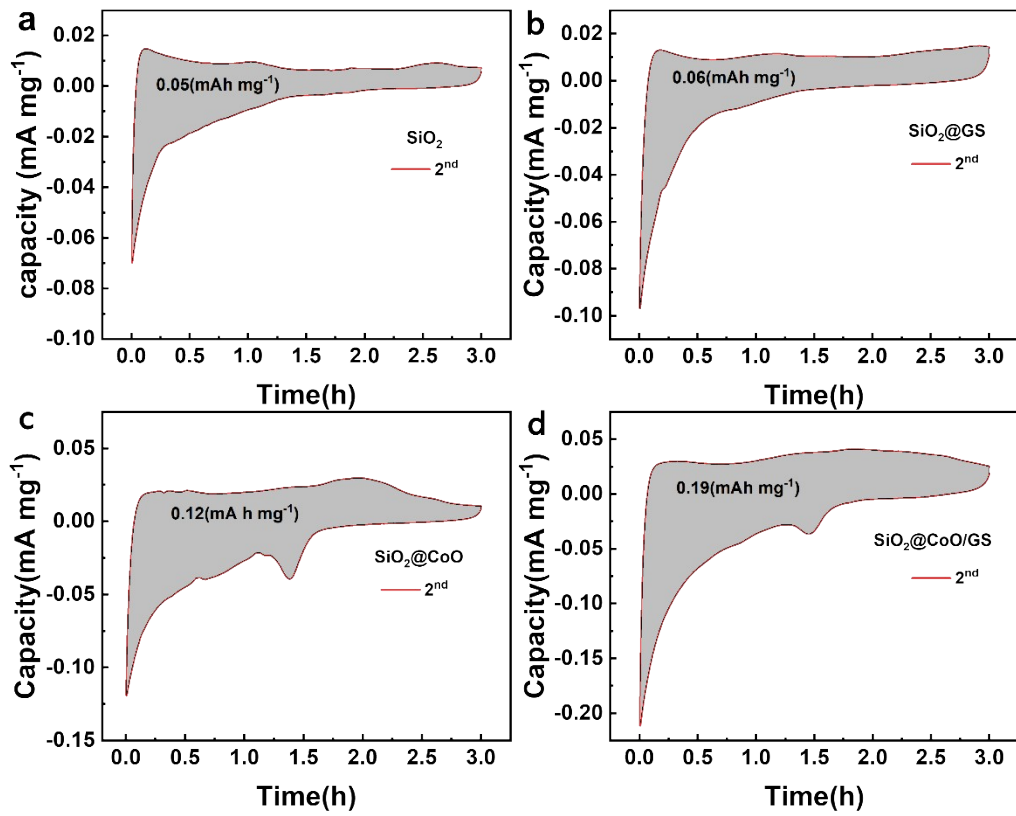

Fig. S5 Integrated area of the cyclic voltammetry curves for SiO<sub>2</sub> (a), SiO<sub>2</sub>/GS (b), SiO<sub>2</sub>@CoO (c) and SiO<sub>2</sub>@CoO/GS (d).

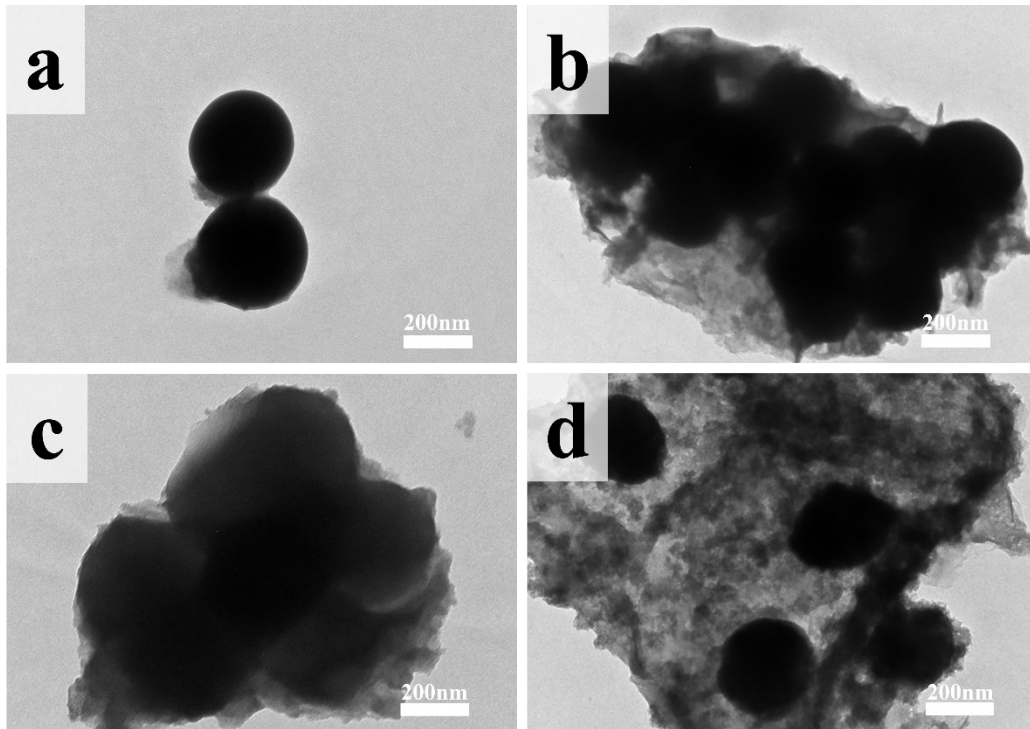

Fig. S6 TEM images of  $\text{SiO}_2$  (a),  $\text{SiO}_2/\text{GS}$  (b),  $\text{SiO}_2@\text{CoO}$  (c) and  $\text{SiO}_2@\text{CoO}/\text{GS}$  (d) after 40 cycles.

**Table S2** Comparison of the cycling and rate performance between this work and those reported in the literature.

| Samples                                       | Methods                            | Initial reversible capacity (mA h g <sup>-1</sup> ), Coulombic efficiency (%) | Performance | Current densities (mA g <sup>-1</sup> ) | corresponding capacity (mA h g <sup>-1</sup> ) | Capacity retention (%) |
|-----------------------------------------------|------------------------------------|-------------------------------------------------------------------------------|-------------|-----------------------------------------|------------------------------------------------|------------------------|
| SiO <sub>2</sub> @CoO/GS <sup>this work</sup> | solvothermal                       | 764 at 200 mA g <sup>-1</sup> , 47.2                                          | Rate        | 100                                     | 707                                            | 100.0                  |
|                                               |                                    |                                                                               |             | 200                                     | 617                                            | 87.3                   |
|                                               |                                    |                                                                               |             | 400                                     | 543                                            | 76.8                   |
|                                               |                                    |                                                                               |             | 800                                     | 480                                            | 67.9                   |
|                                               |                                    |                                                                               |             | 1600                                    | 426                                            | 60.3                   |
|                                               |                                    |                                                                               |             | 3200                                    | 374                                            | 52.9                   |
|                                               |                                    |                                                                               |             | 6400                                    | 322                                            | 45.5                   |
|                                               |                                    |                                                                               |             | 12800                                   | 264                                            | 37.3                   |
|                                               |                                    |                                                                               | Cycling     | 100                                     | 866                                            | 122.5                  |
| SiO <sub>2</sub> @rGo-Co <sup>1</sup>         | hydrothermal and thermal treatment | 310.2 at 100 mA g <sup>-1</sup> , 57.1                                        | Rate        | 100                                     | 310.4                                          | 100.0                  |
|                                               |                                    |                                                                               |             | 200                                     | 270.1                                          | 87.0                   |
|                                               |                                    |                                                                               |             | 500                                     | 198.2                                          | 55.6                   |
|                                               |                                    |                                                                               |             | 1000                                    | 154.8                                          | 49.9                   |
|                                               |                                    |                                                                               |             | 2000                                    | 112.7                                          | 36.3                   |
|                                               |                                    |                                                                               |             | 5000                                    | 70.4                                           | 22.7                   |
|                                               |                                    |                                                                               |             | 100                                     | 306.6                                          | 98.8                   |
|                                               |                                    |                                                                               | Cycling     | 1000                                    | 144.9 after 2000 cycles                        | 94.03                  |
| SiO <sub>2</sub> /pC <sup>2</sup>             | Sol-gel and hydrothermal           | 420 at 100 mA g <sup>-1</sup> , 34                                            | Rate        | 50                                      | 430                                            | 100.0                  |
|                                               |                                    |                                                                               |             | 100                                     | 390                                            | 90.7                   |
|                                               |                                    |                                                                               |             | 200                                     | 302                                            | 70.2                   |
|                                               |                                    |                                                                               |             | 400                                     | 209                                            | 48.6                   |
|                                               |                                    |                                                                               |             | 800                                     | 127                                            | 29.5                   |
|                                               |                                    |                                                                               |             | 1000                                    | 98                                             | 22.8                   |
|                                               |                                    |                                                                               |             | 50                                      | 417                                            | 97                     |
|                                               |                                    |                                                                               | Cycling     | 100                                     | 625 after 600 cycles                           | 49.9                   |
| SiO <sub>2</sub> @C <sup>3</sup>              | Sol-gel method                     | 1110 at 10 mA g <sup>-1</sup> , 47.5                                          | Rate        | 100                                     | 437                                            | 100.0                  |
|                                               |                                    |                                                                               |             | 200                                     | 402                                            | 92.0                   |
|                                               |                                    |                                                                               |             | 400                                     | 350                                            | 80.1                   |
|                                               |                                    |                                                                               |             | 800                                     | 299                                            | 68.4                   |
|                                               |                                    |                                                                               |             | 1000                                    | 281                                            | 64.3                   |
|                                               |                                    |                                                                               |             | 2000                                    | 222                                            | 50.8                   |
|                                               |                                    |                                                                               |             | 200                                     | 410                                            | 93.8                   |

|                   |                   |                                               |         |      |                        |       |
|-------------------|-------------------|-----------------------------------------------|---------|------|------------------------|-------|
|                   |                   |                                               | Cycling | 100  | 511 after 100 cycles   | 73    |
| NCSC <sup>4</sup> | Thermal treatment | 565.4<br>at 100 mA g <sup>-1</sup> ,<br>53.65 | Rate    | 100  | 530                    | 100.0 |
|                   |                   |                                               |         | 200  | 475                    | 89.6  |
|                   |                   |                                               |         | 500  | 410                    | 77.4  |
|                   |                   |                                               |         | 1000 | 380                    | 71.7  |
|                   |                   |                                               |         | 2000 | 345                    | 65.1  |
|                   |                   |                                               |         | 5000 | 273                    | 51.5  |
|                   |                   |                                               |         | 100  | 600                    | 113.2 |
|                   |                   |                                               | Cycling | 2000 | 254.6 after 500 cycles | 77.0  |

### References:

1. Q. An, X. Sun, Y. Na, S. Cai and C. Zheng, *Chinese Chemical Letters*, 2023, 34, 107305.
2. V. Gulavani, S. Kanade, A. Lokhande, M. Ottakam Thotiyl, B. John and A. Yengantiwar, *Energy Tech*, 2024, 2400094.
3. S. Ozen, O. Eroglu and N. Karatepe, *Nanotechnology*, 2023, 34, 485403.
4. J. Mao, M. Chen, Y. Deng, H. Liu, Z. Ju, Z. Xing and X. Cao, *J Mater Sci*, 2019, 54, 12767–12781.
